# Supplementary material for: Severe Mental Illness in LGBT Populations: A Scoping Review
Source: Atypon-hosted journal article supplement (doi:10.1176/appi.ps.201500209), 2016-02-29
Supplement: appi.ps.201500209.ds001.pdf [file appi.ps.201500209.ds001.pdf]

 


Psychiatry Online
