# Supplementary figures and images for: Severe Mental Illness in LGBT Populations: A Scoping Review
Source: Atypon-hosted journal article supplement (doi:10.1176/appi.ps.201500209), 2016-02-29

**Figure 1 Methodology used to conduct scoping review**

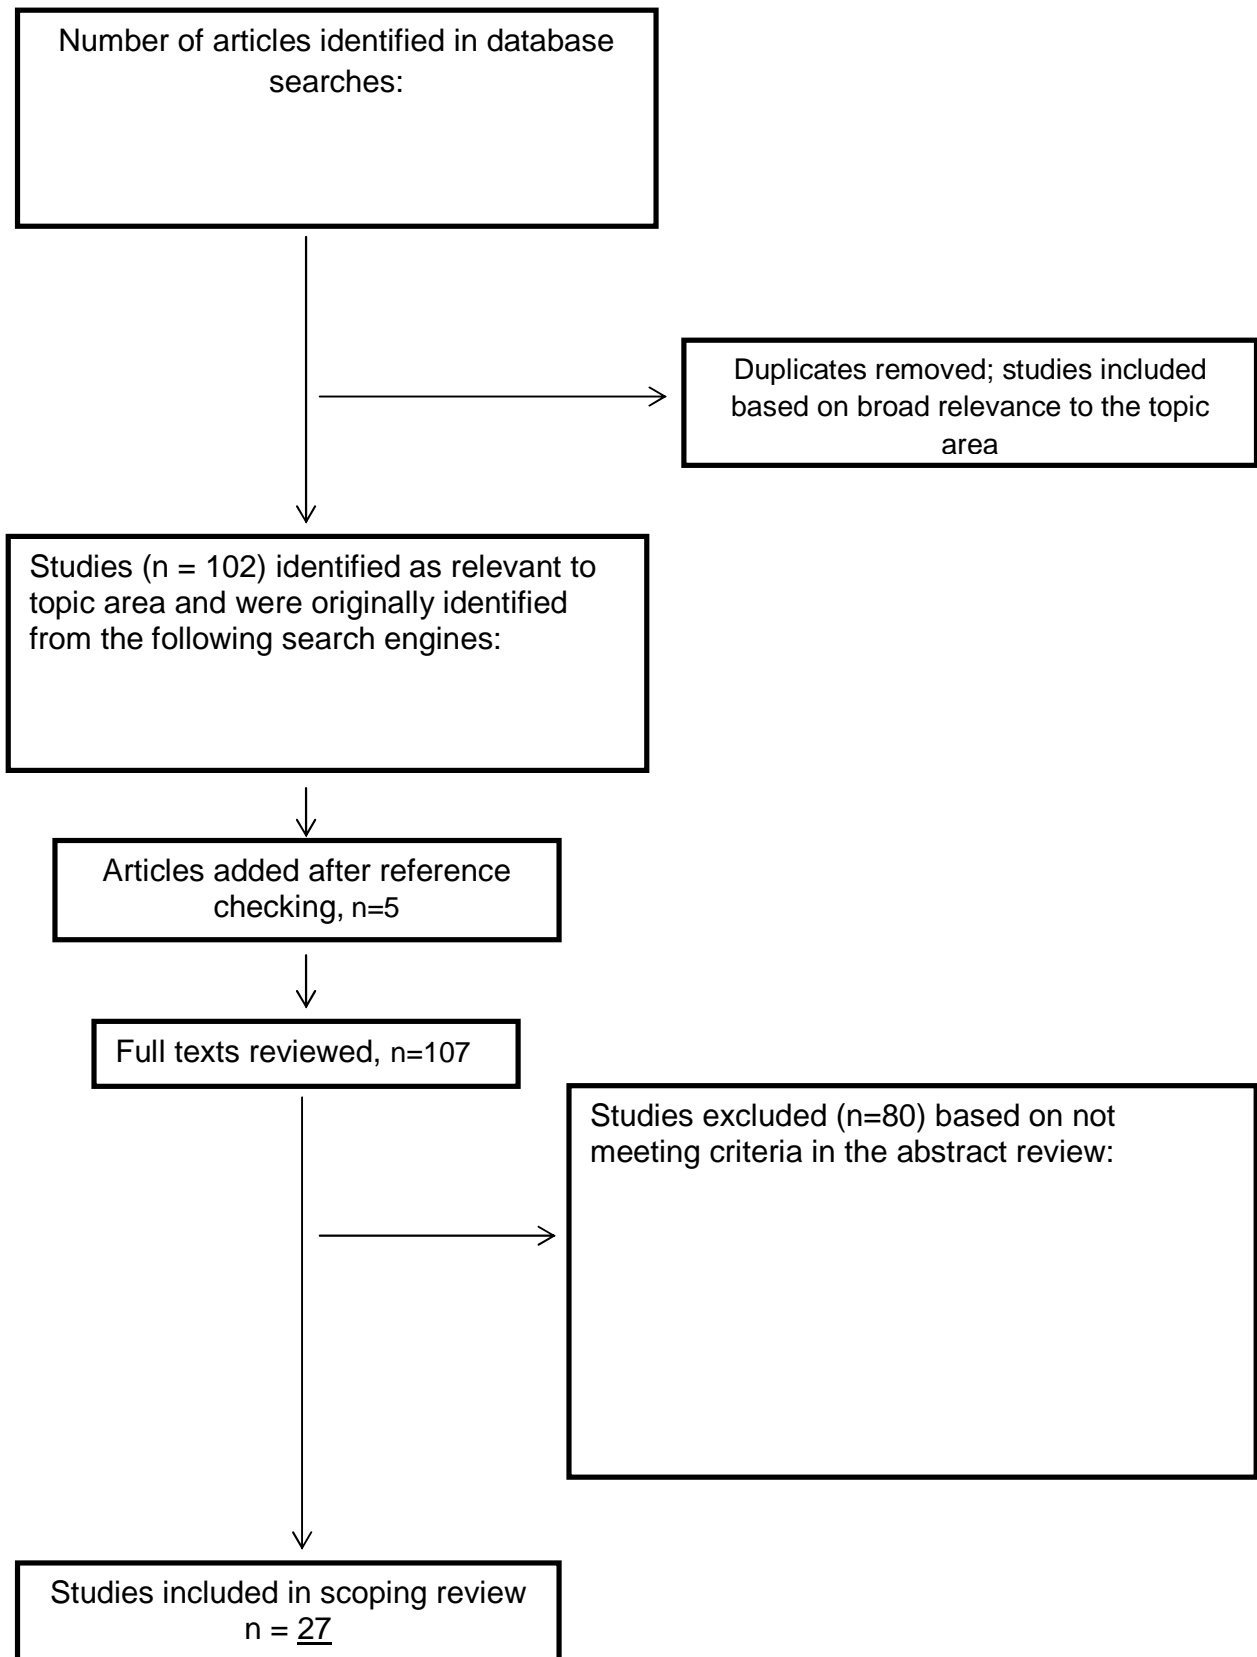

Supplement: appi.ps.201500209.ds001.pdf [file appi.ps.201500209.ds001.pdf]
